# Supplementary material
Source: PubMed Central journal article supplement (PMC9509450)
Supplement: NIHMS1820666-supplement-1.pdf [file NIHMS1820666-supplement-1.pdf]

## Association of Proton Pump Inhibitor Use With All-cause and Cause-specific Mortality

**Authors:** Chun-Han Lo, Peiyun Ni, Yan Yan, Wenjie Ma, Amit D. Joshi, Long H. Nguyen, Raaj S. Mehta, Paul Lochhead, Mingyang Song, Gary C. Curhan, Yin Cao<sup>#</sup>, Andrew T. Chan<sup>#</sup>

<sup>#</sup>These authors contributed equally to this work

### Table of Contents

|                                                                                                                                                                                                 |   |
|-------------------------------------------------------------------------------------------------------------------------------------------------------------------------------------------------|---|
| Supplementary Table 1. Age-standardized characteristics of study participants according to histamine-2 receptor antagonist use over follow-up .....                                             | 2 |
| Supplementary Table 2. Hazard ratios (95% confidence intervals) for all-cause and cause-specific mortality according to proton pump inhibitor use and histamine-2 receptor antagonist use ..... | 4 |
| Supplementary Table 3. Hazard ratios (95% confidence intervals) for all-cause and cause-specific mortality according to proton pump inhibitor use in an active-comparator analysis.....         | 5 |

**Supplementary Table 1. Age-standardized characteristics of study participants according to histamine-2 receptor antagonist use over follow-up<sup>a</sup>**

|                                                | Women (N=50,156) |                |            | Men (N=21,731) |                |             |
|------------------------------------------------|------------------|----------------|------------|----------------|----------------|-------------|
|                                                | All              | H2RA non-users | H2RA users | All            | H2RA non-users | H2RA users  |
| Age at baseline, years, mean (SD)              | 68.8 (6.9)       | 68.8 (6.9)     | 68.2 (6.8) | 68.0 (8.0)     | 68.0 (8.0)     | 67.0 (7.6)  |
| White, %                                       | 91.4             | 91.4           | 90.5       | 95.0           | 95.0           | 96.4        |
| Smoking status, %                              |                  |                |            |                |                |             |
| Never smokers                                  | 49.5             | 49.6           | 45.4       | 54.6           | 54.7           | 48.1        |
| Past smokers                                   | 47.2             | 47.0           | 52.0       | 42.5           | 42.4           | 49.7        |
| Current smokers                                | 3.3              | 3.4            | 2.6        | 2.9            | 2.9            | 2.2         |
| Body mass index, kg/m <sup>2</sup> , mean (SD) | 25.8 (5.2)       | 25.7 (5.2)     | 26.6 (5.3) | 25.9 (3.9)     | 25.9 (3.9)     | 26.3 (4.4)  |
| Physical activity, MET-hrs/wk, mean (SD)       | 18.7 (14.9)      | 18.8 (14.9)    | 17.4 (14)  | 34.6 (23.3)    | 34.7 (23.4)    | 31.5 (20.5) |
| Alternate Healthy Eating Index-2010, mean (SD) | 49.7 (8.9)       | 49.7 (8.9)     | 49.2 (8.8) | 50.4 (9.4)     | 50.4 (9.4)     | 49.9 (9.3)  |
| Alcohol intake, g/d, mean (SD)                 | 5.8 (8.6)        | 5.8 (8.6)      | 5.5 (8.2)  | 11.3 (12.6)    | 11.3 (12.6)    | 12.4 (13.3) |
| Regular NSAID use, %                           | 67.1             | 66.9           | 73.7       | 55.6           | 55.4           | 63.1        |
| Physical examination in the past two years, %  | 76.8             | 76.8           | 75.6       | 69.2           | 69.2           | 69.9        |
| Medical condition                              |                  |                |            |                |                |             |
| Cancer                                         | 23.0             | 22.9           | 24.9       | 24.9           | 24.9           | 30.1        |
| Myocardial infarction                          | 5.2              | 5.2            | 7.9        | 9.9            | 9.8            | 14.7        |
| Stroke                                         | 3.5              | 3.5            | 5.5        | 4.1            | 4.1            | 6.3         |
| Hypertension                                   | 63.7             | 63.3           | 76.6       | 56.6           | 56.3           | 70.6        |
| Diabetes mellitus                              | 12.4             | 12.3           | 15.3       | 12.9           | 12.8           | 18.2        |
| Hypercholesterolemia                           | 71.7             | 71.4           | 80.1       | 64.5           | 64.4           | 74.5        |
| Chronic obstructive pulmonary disease          | 8.9              | 8.8            | 12.4       | 3.8            | 3.7            | 5.5         |

Abbreviations: H2RA, histamine-2 receptor antagonist; MET, metabolic equivalent of task; NSAID, non-steroidal anti-inflammatory drug; SD, standard deviation.

---

<sup>a</sup> Characteristics of study participants are presented by H2RA use. All variables are standardized to the age distribution of the study population except for age. Mean (SD) is presented for continuous variables and percentage of participants for categorical variables. Values for all variables but age were calculated over follow-up.

Journal Pre-proof

**Supplementary Table 2. Hazard ratios (95% confidence intervals) for all-cause and cause-specific mortality according to proton pump inhibitor use and histamine-2 receptor antagonist use**

| Cause of death                 | Non-users of PPIs and H2RAs |                          | PPI users     |                          | H2RA users    |                          |
|--------------------------------|-----------------------------|--------------------------|---------------|--------------------------|---------------|--------------------------|
|                                | No. of events               | HR (95% CI) <sup>a</sup> | No. of events | HR (95% CI) <sup>a</sup> | No. of events | HR (95% CI) <sup>a</sup> |
| <b>All causes</b>              | 18440                       | 1 (reference)            | 1657          | 1.25 (1.19-1.32)         | 473           | 1.09 (0.99-1.20)         |
| <b>Cancer</b>                  | 3842                        | 1 (reference)            | 386           | 1.40 (1.25-1.56)         | 105           | 1.29 (1.05-1.57)         |
| <b>Cardiovascular diseases</b> | 4508                        | 1 (reference)            | 365           | 1.18 (1.06-1.33)         | 120           | 1.11 (0.91-1.34)         |
| <b>Others<sup>b</sup></b>      | 10090                       | 1 (reference)            | 906           | 1.23 (1.15-1.33)         | 248           | 1.02 (0.90-1.16)         |

Abbreviations: CI, confidence interval; H2RA, histamine-2 receptor antagonist; HR, hazard ratio; NSAID, non-steroidal anti-inflammatory drug; PPI, proton pump inhibitor.

<sup>a</sup> Cox proportional hazards models stratified by age, cohort, and questionnaire cycle and adjusted for race, smoking status, body mass index, physical activity, Alternate Healthy Eating Index-2010, alcohol intake, regular NSAID use, history of cancer, myocardial infarction, stroke, hypertension, diabetes mellitus, hypercholesterolemia, gastroesophageal reflux disease, Barrett's esophagus, peptic ulcer disease, gastrointestinal bleeding, and chronic obstructive pulmonary disease.

<sup>b</sup> Others include respiratory diseases, digestive diseases, renal diseases, neurological diseases, infectious diseases, and other less common medical conditions.

**Supplementary Table 3. Hazard ratios (95% confidence intervals) for all-cause and cause-specific mortality according to proton pump inhibitor use in an active-comparator analysis**

| Cause of death                 | Lag-time <sup>a</sup> |                          |               |                          |               |                          |
|--------------------------------|-----------------------|--------------------------|---------------|--------------------------|---------------|--------------------------|
|                                | No lag                |                          | 2 years       |                          | 4 years       |                          |
|                                | No. of events         | HR (95% CI) <sup>b</sup> | No. of events | HR (95% CI) <sup>b</sup> | No. of events | HR (95% CI) <sup>b</sup> |
| <b>All causes</b>              |                       |                          |               |                          |               |                          |
| H2RA users                     | 473                   | 1 (reference)            | 411           | 1 (reference)            | 364           | 1 (reference)            |
| PPI users                      | 1747                  | 1.14 (1.03-1.27)         | 1475          | 1.10 (0.99-1.23)         | 1172          | 0.97 (0.86-1.10)         |
| <b>Cancer</b>                  |                       |                          |               |                          |               |                          |
| H2RA users                     | 105                   | 1 (reference)            | 76            | 1 (reference)            | 55            | 1 (reference)            |
| PPI users                      | 404                   | 1.08 (0.86-1.34)         | 285           | 1.08 (0.83-1.39)         | 188           | 0.96 (0.71-1.31)         |
| <b>Cardiovascular diseases</b> |                       |                          |               |                          |               |                          |
| H2RA users                     | 120                   | 1 (reference)            | 105           | 1 (reference)            | 95            | 1 (reference)            |
| PPI users                      | 384                   | 1.06 (0.86-1.32)         | 323           | 0.99 (0.78-1.24)         | 259           | 0.87 (0.68-1.11)         |
| <b>Others<sup>c</sup></b>      |                       |                          |               |                          |               |                          |
| H2RA users                     | 248                   | 1 (reference)            | 230           | 1 (reference)            | 214           | 1 (reference)            |
| PPI users                      | 959                   | 1.21 (1.05-1.40)         | 867           | 1.16 (1.00-1.34)         | 725           | 1.02 (0.88-1.20)         |

Abbreviations: CI, confidence interval; H2RA, histamine-2 receptor antagonist; HR, hazard ratio; NSAID, non-steroidal anti-inflammatory drug; PPI, proton pump inhibitor.

<sup>a</sup> For a modified lag-time approach, we considered a two-year, a four-year, and a six-year lag-time based on the structure of our data. For example, in a two-year lag-time analysis, we used the exposure status in 2004 to model mortality risk starting in 2006; in a four-year lag-time analysis, we used the exposure status in 2004 to model mortality risk starting in 2008, and so on.

<sup>b</sup> Cox proportional hazards models stratified by age, cohort, and questionnaire cycle and adjusted for race, smoking status, body mass index, physical activity, Alternate Healthy Eating Index-2010, alcohol intake, regular NSAID use, history of cancer, myocardial infarction, stroke, hypertension, diabetes mellitus, hypercholesterolemia,

---

gastroesophageal reflux disease, Barrett's esophagus, peptic ulcer disease, gastrointestinal bleeding, and chronic obstructive pulmonary disease.

° Others include respiratory diseases, digestive diseases, renal diseases, neurological diseases, infectious diseases, and other less common medical conditions.

Journal Pre-proof
